# Supplementary material for: Structural diversity of Zn(ii)/Cd(ii) complexes based on bis(pyridyl) ligands with a long flexible spacer: From zero-dimensional binuclear, one-dimensional chain, two-dimensional layer, to three-dimensional frameworks
Source: Royal Society of Chemistry journal article supplement (doi:10.1039/c0ce00717j), 2011-01-01
Supplement: c0ce00717j.pdf [file c0ce00717j.pdf]

Electronic Supplementary Information (ESI)

**Structural diversity of Zn(II)/Cd(II) complexes based on bis(pyridyl) ligands with long flexible spacer: from zero-dimensional binuclear, one-dimensional chain, two-dimensional layer, to three-dimensional frameworks †**

**Zhao-Peng Deng, Li-Hua Huo, Hui-Ling Qi, Li-Na Zhu, Hui Zhao and Shan Gao\***

**PXRD Analysis.** In order to check the bulk purity of the complexes, powder X-ray diffraction patterns have been measured at room temperature (Figure S1). The measured and simulated PXRD patterns for all the complexes are quite similar, confirming the homogeneity of the bulk samples.

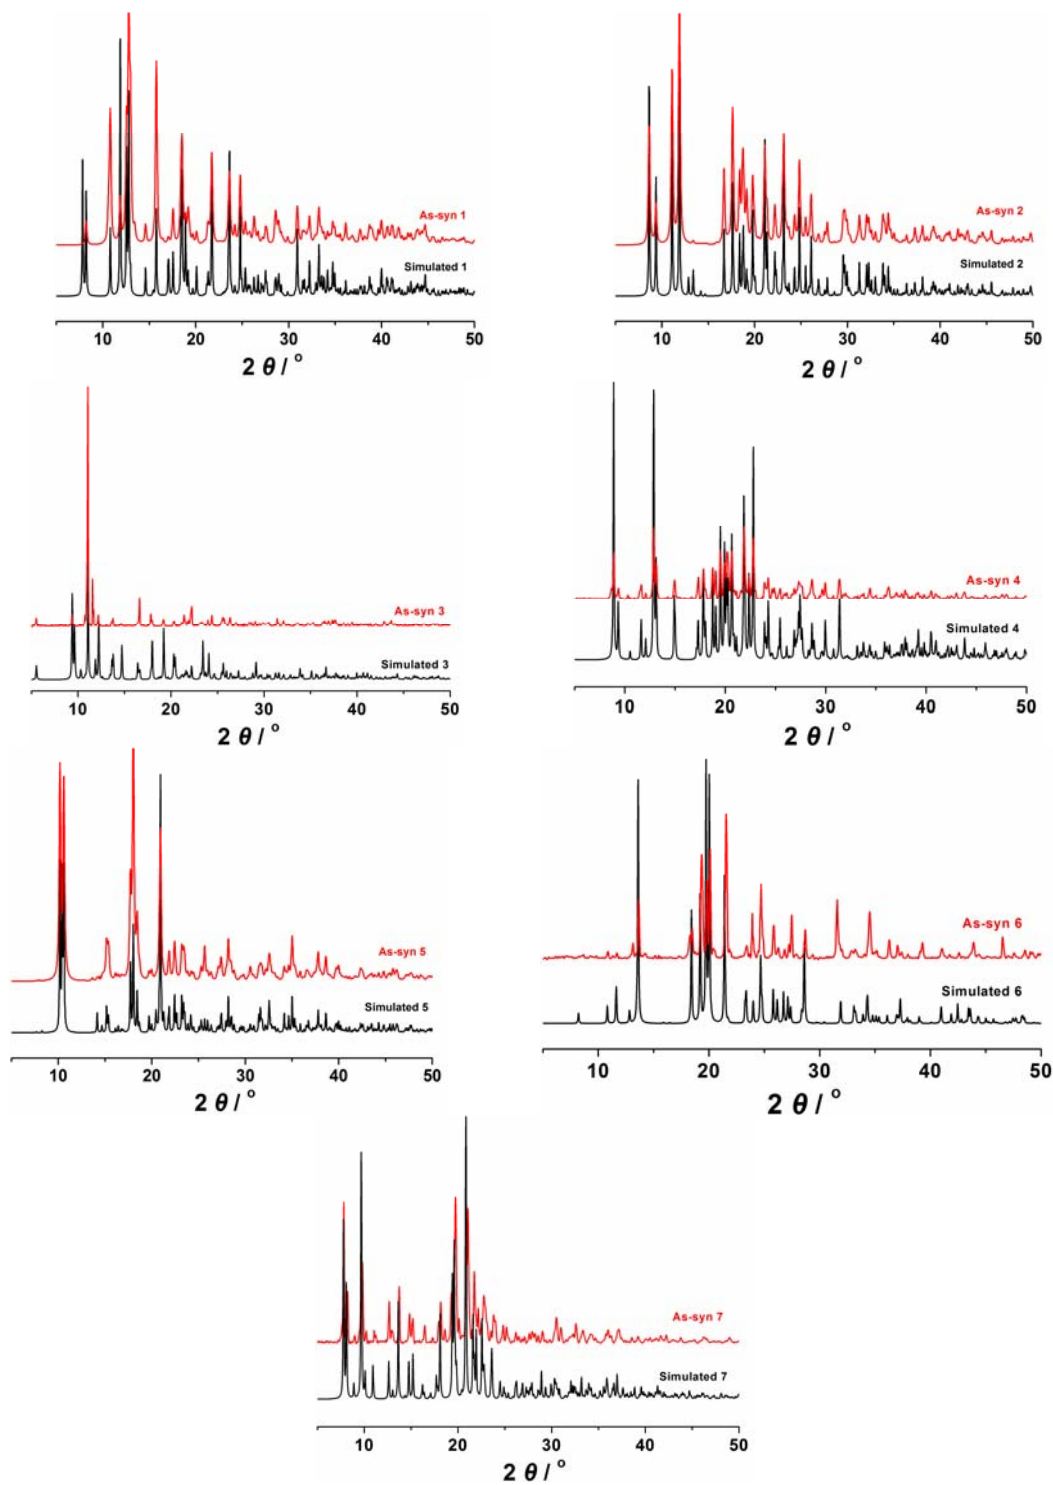

Figure S1. PXR D patterns for complexes 1-7.

**Table S1.** Selected Bond Lengths [Å] and Angles [°] for Complexes **1–7**<sup>a</sup>

| Complex 1                      |            |                                             |            |
|--------------------------------|------------|---------------------------------------------|------------|
| Cd(1)-O(2W)                    | 2.287(2)   | Cd(1)-O(1)                                  | 2.333(2)   |
| Cd(1)-N(4) <sup>i</sup>        | 2.309(3)   | Cd(1)-O(1W)                                 | 2.357(2)   |
| Cd(1)-N(1)                     | 2.314(3)   | Cd(1)-O(3W)                                 | 2.362(2)   |
| O(2W)-Cd(1)-N(4) <sup>i</sup>  | 96.03(9)   | N(1)-Cd(1)-O(1W)                            | 176.62(9)  |
| O(2W)-Cd(1)-N(1)               | 97.34(10)  | O(1)-Cd(1)-O(1W)                            | 80.97(8)   |
| N(4) <sup>i</sup> -Cd(1)-N(1)  | 92.10(10)  | O(2W)-Cd(1)-O(3W)                           | 79.78(9)   |
| O(2W)-Cd(1)-O(1)               | 160.40(8)  | N(4) <sup>i</sup> -Cd(1)-O(3W)              | 175.28(8)  |
| N(4) <sup>i</sup> -Cd(1)-O(1)  | 98.09(9)   | N(1)-Cd(1)-O(3W)                            | 90.60(10)  |
| N(1)-Cd(1)-O(1)                | 95.65(9)   | O(1)-Cd(1)-O(3W)                            | 85.48(8)   |
| O(2W)-Cd(1)-O(1W)              | 85.90(9)   | O(1W)-Cd(1)-O(3W)                           | 89.03(9)   |
| N(4) <sup>i</sup> -Cd(1)-O(1W) | 88.50(9)   |                                             |            |
| Complex 2                      |            |                                             |            |
| Zn(1)-O(1)                     | 1.914(4)   | Zn(1)-N(1)                                  | 1.995(5)   |
| Zn(1)-O(4) <sup>i</sup>        | 1.926(5)   | Zn(1)-N(4) <sup>ii</sup>                    | 2.027(5)   |
| O(1)-Zn(1)-O(4) <sup>i</sup>   | 103.7(2)   | O(1)-Zn(1)-N(4) <sup>ii</sup>               | 110.52(19) |
| O(1)-Zn(1)-N(1)                | 114.9(2)   | O(4) <sup>i</sup> -Zn(1)-N(4) <sup>ii</sup> | 104.99(19) |
| O(4) <sup>i</sup> -Zn(1)-N(1)  | 113.6(2)   | N(1)-Zn(1)-N(4) <sup>ii</sup>               | 108.65(19) |
| Complex 3                      |            |                                             |            |
| Cd(1)-N(5)                     | 2.327(3)   | Cd(1)-O(1)                                  | 2.423(3)   |
| Cd(1)-N(1)                     | 2.356(3)   | Cd(1)-O(2)                                  | 2.476(3)   |
| Cd(1)-N(4) <sup>i</sup>        | 2.374(3)   | Cd(1)-O(5)                                  | 2.554(4)   |
| Cd(1)-O(4)                     | 2.384(3)   |                                             |            |
| N(5)-Cd(1)-N(1)                | 87.26(10)  | N(1)-Cd(1)-O(2)                             | 88.83(12)  |
| N(5)-Cd(1)-N(4) <sup>i</sup>   | 90.04(11)  | N(4) <sup>i</sup> -Cd(1)-O(2)               | 91.77(11)  |
| N(1)-Cd(1)-N(4) <sup>i</sup>   | 177.22(11) | O(4)-Cd(1)-O(2)                             | 126.79(11) |
| N(5)-Cd(1)-O(4)                | 144.74(12) | O(1)-Cd(1)-O(2)                             | 51.33(11)  |
| N(1)-Cd(1)-O(4)                | 88.86(12)  | N(5)-Cd(1)-O(5)                             | 93.95(10)  |
| N(4) <sup>i</sup> -Cd(1)-O(4)  | 92.96(12)  | N(1)-Cd(1)-O(5)                             | 89.13(12)  |

|                                             |            |                                |            |
|---------------------------------------------|------------|--------------------------------|------------|
| N(5)-Cd(1)-O(1)                             | 139.23(12) | N(4) <sup>i</sup> -Cd(1)-O(5)  | 90.37(11)  |
| N(1)-Cd(1)-O(1)                             | 95.28(12)  | O(4)-Cd(1)-O(5)                | 50.94(10)  |
| N(4) <sup>i</sup> -Cd(1)-O(1)               | 87.21(12)  | O(1)-Cd(1)-O(5)                | 126.71(11) |
| O(4)-Cd(1)-O(1)                             | 76.03(13)  | O(2)-Cd(1)-O(5)                | 176.99(9)  |
| N(5)-Cd(1)-O(2)                             | 88.17(10)  |                                |            |
| <b>Complex 4</b>                            |            |                                |            |
| Zn(1)-O(1)                                  | 1.968(6)   | Zn(1)-O(2)                     | 2.551(6)   |
| Zn(1)-N(3)                                  | 1.986(6)   | Zn(1)-O(4)                     | 2.049(6)   |
| Zn(1)-N(1)                                  | 2.007(6)   | Zn(1)-O(5)                     | 2.766(6)   |
| O(1)-Zn(1)-N(3)                             | 126.5(3)   | O(1)-Zn(1)-O(4)                | 95.0(2)    |
| O(1)-Zn(1)-N(1)                             | 116.0(3)   | N(3)-Zn(1)-O(4)                | 113.8(2)   |
| N(3)-Zn(1)-N(1)                             | 106.9(2)   | N(1)-Zn(1)-O(4)                | 92.7(2)    |
| O(1)-Zn(1)-O(2)                             | 53.9(2)    | O(2)-Zn(1)-O(5)                | 120.7(2)   |
| O(2)-Zn(1)-O(4)                             | 147.5(2)   | O(2)-Zn(1)-N(1)                | 93.4(2)    |
| O(2)-Zn(1)-N(3)                             | 94.8(2)    | O(5)-Zn(1)-N(1)                | 142.3(2)   |
| O(5)-Zn(1)-N(3)                             | 87.2(2)    | O(5)-Zn(1)-O(1)                | 78.1(2)    |
| O(5)-Zn(1)-O(4)                             | 50.1(2)    |                                |            |
| <b>Complex 5</b>                            |            |                                |            |
| Cd(1)-N(4) <sup>i</sup>                     | 2.321(2)   | Cd(1)-N(5)                     | 2.379(2)   |
| Cd(1)-N(1)                                  | 2.347(2)   | Cd(1)-O(1)                     | 2.5197(19) |
| Cd(1)-N(8) <sup>ii</sup>                    | 2.362(2)   | Cd(1)-O(4)                     | 2.546(3)   |
| N(4) <sup>i</sup> -Cd(1)-N(1)               | 174.86(7)  | N(8) <sup>ii</sup> -Cd(1)-O(1) | 86.69(6)   |
| N(4) <sup>i</sup> -Cd(1)-N(8) <sup>ii</sup> | 89.98(7)   | N(5)-Cd(1)-O(1)                | 78.13(6)   |
| N(1)-Cd(1)-N(8) <sup>ii</sup>               | 86.42(7)   | N(4) <sup>i</sup> -Cd(1)-O(4)  | 85.59(8)   |
| N(4) <sup>i</sup> -Cd(1)-N(5)               | 97.70(8)   | N(1)-Cd(1)-O(4)                | 92.94(8)   |
| N(1)-Cd(1)-N(5)                             | 86.72(8)   | N(8) <sup>ii</sup> -Cd(1)-O(4) | 118.95(8)  |
| N(8) <sup>ii</sup> -Cd(1)-N(5)              | 163.61(7)  | N(5)-Cd(1)-O(4)                | 76.26(8)   |
| N(4) <sup>i</sup> -Cd(1)-O(1)               | 96.24(7)   | O(1)-Cd(1)-O(4)                | 154.34(8)  |
| N(1)-Cd(1)-O(1)                             | 87.23(7)   |                                |            |
| <b>Complex 6</b>                            |            |                                |            |
| Zn(1)-N(1)                                  | 2.002(5)   |                                |            |
| N(1)-Zn(1)-N(1) <sup>i</sup>                | 111.15(14) | N(1)-Zn(1)-N(1) <sup>iii</sup> | 106.2(3)   |

| Complex 7                                  |            |                                            |            |
|--------------------------------------------|------------|--------------------------------------------|------------|
| Cd(1)-N(3)                                 | 2.405(5)   | Cd(1)-N(5)                                 | 2.409(4)   |
| Cd(1)-N(3) <sup>i</sup>                    | 2.405(5)   | Cd(1)-N(1) <sup>i</sup>                    | 2.420(5)   |
| Cd(1)-N(5) <sup>i</sup>                    | 2.409(4)   | Cd(1)-N(1)                                 | 2.420(5)   |
| N(3)-Cd(1)-N(3) <sup>i</sup>               | 180.000(1) | N(5) <sup>i</sup> -Cd(1)-N(1) <sup>i</sup> | 88.44(17)  |
| N(3)-Cd(1)-N(5) <sup>i</sup>               | 89.72(17)  | N(5)-Cd(1)-N(1) <sup>i</sup>               | 91.56(17)  |
| N(3) <sup>i</sup> -Cd(1)-N(5) <sup>i</sup> | 90.28(17)  | N(3)-Cd(1)-N(1)                            | 89.91(18)  |
| N(3)-Cd(1)-N(5)                            | 90.28(17)  | N(3) <sup>i</sup> -Cd(1)-N(1)              | 90.09(18)  |
| N(3) <sup>i</sup> -Cd(1)-N(5)              | 89.72(17)  | N(5) <sup>i</sup> -Cd(1)-N(1)              | 91.56(17)  |
| N(5) <sup>i</sup> -Cd(1)-N(5)              | 180.0(2)   | N(5)-Cd(1)-N(1)                            | 88.44(17)  |
| N(3)-Cd(1)-N(1) <sup>i</sup>               | 90.09(18)  | N(1) <sup>i</sup> -Cd(1)-N(1)              | 180.000(1) |
| N(3) <sup>i</sup> -Cd(1)-N(1) <sup>i</sup> | 89.91(18)  |                                            |            |

<sup>a</sup> Symmetry transformations used to generate equivalent atoms: (i) -x+1,-y+1,-z+1 for **1**; (i) -x+3/2,y+1/2,-z+1/2; (ii) -x+1/2,y+1/2,-z+1/2 for **2**; (i) x,-y+1,z+1/2 for **3**; (i) x-1/2,-y+1/2,z; (ii) x,y,z-1 for **5**; (i) x,-y+2,-z+2; (iii) -x+2,-y+2,z for **6**; (i) -x,-y+1,-z+1 for **7**.

**Table S2.** Selected Hydrogen Bond Parameters for Complexes **1**, **5** and **6<sup>a</sup>**

| D-H...A                            | d(H...A)  | d(D...A) | <(DHA) |
|------------------------------------|-----------|----------|--------|
| Complex 1                          |           |          |        |
| O(1W)-H(1W1)...O(2) <sup>ii</sup>  | 1.89(3)   | 2.737(3) | 175(3) |
| O(1W)-H(1W2)...O(4)                | 1.995(12) | 2.838(4) | 170(4) |
| O(1W)-H(1W2)...S(1)                | 2.80(3)   | 3.493(3) | 140(3) |
| O(2W)-H(2W1)...O(3) <sup>iii</sup> | 1.835(13) | 2.678(4) | 169(5) |
| O(2W)-H(2W2)...O(4) <sup>ii</sup>  | 1.89(3)   | 2.744(3) | 172(4) |
| O(3W)-H(3W1)...O(4) <sup>ii</sup>  | 2.096(15) | 2.893(3) | 157(3) |
| O(3W)-H(3W1)...S(1) <sup>ii</sup>  | 2.885(17) | 3.700(3) | 162(4) |
| O(3W)-H(3W2)...O(2)                | 1.959(16) | 2.764(3) | 160(4) |
| O(3W)-H(3W2)...S(1)                | 2.79(3)   | 3.418(3) | 133(4) |
| N(2)-H(5)...O(1)                   | 2.15      | 2.944(4) | 153.8  |
| N(3)-H(14)...O(1) <sup>i</sup>     | 2.16      | 2.989(3) | 162.9  |
| Complex 5                          |           |          |        |
| N(2)-H(2N)...O(2) <sup>v</sup>     | 2.24      | 2.887(3) | 132.2  |
| N(3)-H(3N)...O(3) <sup>vi</sup>    | 2.21      | 3.045(4) | 162.8  |

|                                                                                                                                                                                                                |      |          |       |
|----------------------------------------------------------------------------------------------------------------------------------------------------------------------------------------------------------------|------|----------|-------|
| N(7)-H(7N)...O(3) <sup>v</sup>                                                                                                                                                                                 | 2.54 | 3.183(4) | 132.2 |
| Complex <b>6</b>                                                                                                                                                                                               |      |          |       |
| N(2)-H(2N)...O(2')                                                                                                                                                                                             | 2.54 | 3.12(3)  | 125.6 |
| <sup>a</sup> Symmetry transformations used to generate equivalent atoms: (i) -x+1,-y+1,-z+1; (ii) -x,y+1/2,-z+3/2; (iii) x,y+1,z for <b>1</b> ; (v) -x+1/2,y-1/2,z+1/2; (vi) -x+1/2,y-1/2,z-1/2 for <b>5</b> . |      |          |       |
